# Supplementary material for: De novo DNA methyltransferase activity in colorectal cancer is directed towards H3K36me3 marked CpG islands
Source: PubMed Central journal article supplement (PMC7846778; doi:10.1038/s41467-020-20716-w), 2021-01-29
Supplement: 41467_2020_20716_MOESM1_ESM.pdf [file 41467_2020_20716_MOESM1_ESM.pdf]

## Supplementary Tables

### Supplementary Table 1

Clone statistics for bisulphite PCR analysis of CGIs at native and ectopic loci in HCT116 cells.

| CGI                      | Total number of clones | Number of clones by PCR amplicon |
|--------------------------|------------------------|----------------------------------|
| <i>Native locations</i>  |                        |                                  |
| <i>BUB1</i>              | 7                      | L: 3, R: 4                       |
| <i>MLH1</i>              | 7                      | L: 7                             |
| <i>CDKN2A</i>            | 23                     | L: 21, R: 2                      |
| <i>SFRP1</i>             | 18                     | L: 10, R: 8                      |
| <i>ZFP42</i>             | 16                     | L: 10, R: 6                      |
| <i>GATA4</i>             | 25                     | L: 16, R: 9                      |
| <i>CDH7</i>              | 41                     | L: 19, R1: 17, R2: 5             |
| <i>CDH13</i>             | 30                     | L: 11, R1: 3, R2: 16             |
| <i>EPHB1</i>             | 20                     | R: 20                            |
| <i>DAZL</i>              | 25                     | L: 9, R: 16                      |
| <i>Ectopic locations</i> |                        |                                  |
| <i>BUB1</i>              | 10                     | L1: 10                           |
| <i>MLH1</i>              | 15                     | L: 6, R: 9                       |
| <i>CDKN2A</i>            | 13                     | L: 6, R: 7                       |
| <i>SFRP1</i>             | 12                     | R1: 6, R2: 6                     |
| <i>ZFP42</i>             | 7                      | L: 2, R: 5                       |
| <i>GATA4</i>             | 8                      | L1: 3, L2: 3, R: 2               |
| <i>CDH7</i>              | 34                     | L: 4, R1: 14, R2: 16             |
| <i>CDH13</i>             | 24                     | L: 7, R1: 10, R2: 7              |
| <i>EPHB1</i>             | 11                     | L: 1, R1: 4, R2: 6               |
| <i>DAZL</i>              | 22                     | L: 8, R: 14                      |

### Supplementary Table 2

Clone statistics for bisulphite PCR analysis of CGIs at native and ectopic loci in RKO cells.

| CGI                      | Total number of clones | Number of clones by PCR amplicon |
|--------------------------|------------------------|----------------------------------|
| <i>Native locations</i>  |                        |                                  |
| <i>MLH1</i>              | 17                     | L: 17                            |
| <i>CDKN2A</i>            | 39                     | L: 27, R: 12                     |
| <i>SFRP1</i>             | 24                     | L: 13, R: 11                     |
| <i>CDH7</i>              | 30                     | L: 16, R2: 14                    |
| <i>Ectopic locations</i> |                        |                                  |
| <i>MLH1</i>              | 28                     | L: 22, R: 6                      |
| <i>CDKN2A</i>            | 21                     | L: 21                            |
| <i>SFRP1</i>             | 24                     | R1: 3, R2: 6                     |
| <i>CDH7</i>              | 29                     | L: 20, R2: 9                     |

Supplementary Table 3

GO-terms enriched in genes associated with DNMT3B targets in DKO cells.

*P-values are from Benjamini-Hochberg corrected two-sided Fisher's exact tests.**Fold change was calculated as the % of DNMT3B target CGIs associated with a gene annotated with a specific term over the % control CGIs associated with a gene annotated with that term.*

| Term ID    | Adjusted p-value | Fold change | Term description                                                                                               |
|------------|------------------|-------------|----------------------------------------------------------------------------------------------------------------|
| GO:0032502 | 0.001            | 1.127       | developmental process                                                                                          |
| GO:0044767 | 0.001            | 1.130       | single-organism developmental process                                                                          |
| GO:0004672 | 0.004            | 1.544       | protein kinase activity                                                                                        |
| GO:0016301 | 0.007            | 1.429       | kinase activity                                                                                                |
| GO:0016773 | 0.007            | 1.436       | phosphotransferase activity, alcohol group as acceptor                                                         |
| GO:0007389 | 0.007            | 1.445       | pattern specification process                                                                                  |
| GO:0009653 | 0.007            | 1.189       | anatomical structure morphogenesis                                                                             |
| GO:0009792 | 0.007            | 1.408       | embryo development ending in birth or egg hatching                                                             |
| GO:0043009 | 0.007            | 1.406       | chordate embryonic development                                                                                 |
| GO:0044707 | 0.007            | 1.109       | single-multicellular organism process                                                                          |
| GO:0048856 | 0.007            | 1.117       | anatomical structure development                                                                               |
| GO:0071560 | 0.007            | 1.885       | cellular response to transforming growth factor beta stimulus                                                  |
| GO:0001501 | 0.009            | 1.477       | skeletal system development                                                                                    |
| GO:0003002 | 0.010            | 1.453       | regionalization                                                                                                |
| GO:0007155 | 0.010            | 1.327       | cell adhesion                                                                                                  |
| GO:0048731 | 0.010            | 1.128       | system development                                                                                             |
| GO:0048732 | 0.010            | 1.469       | gland development                                                                                              |
| GO:0072364 | 0.010            | 5.681       | regulation of cellular ketone metabolic process by regulation of transcription from RNA polymerase II promoter |
| GO:0009790 | 0.011            | 1.291       | embryo development                                                                                             |
| GO:0032501 | 0.011            | 1.095       | multicellular organismal process                                                                               |
| GO:0048513 | 0.011            | 1.155       | animal organ development                                                                                       |
| GO:0014902 | 0.014            | 2.209       | myotube differentiation                                                                                        |
| GO:0007275 | 0.015            | 1.117       | multicellular organism development                                                                             |
| GO:0022610 | 0.023            | 1.280       | biological adhesion                                                                                            |
| GO:0048568 | 0.023            | 1.394       | embryonic organ development                                                                                    |
| GO:0060541 | 0.023            | 1.639       | respiratory system development                                                                                 |
| GO:0060765 | 0.023            | 3.458       | regulation of androgen receptor signaling pathway                                                              |
| GO:1903798 | 0.023            | 3.458       | regulation of production of miRNAs involved in gene silencing by miRNA                                         |
| GO:0071559 | 0.025            | 1.661       | response to transforming growth factor beta                                                                    |
| GO:0009798 | 0.025            | 1.961       | axis specification                                                                                             |
| GO:0050704 | 0.025            | 3.550       | regulation of interleukin-1 secretion                                                                          |
| GO:0060965 | 0.026            | 4.754       | negative regulation of gene silencing by miRNA                                                                 |
| GO:0016310 | 0.026            | 1.212       | phosphorylation                                                                                                |
| GO:0060323 | 0.026            | 2.768       | head morphogenesis                                                                                             |
| GO:0060324 | 0.026            | 2.768       | face development                                                                                               |
| GO:0070920 | 0.026            | 3.314       | regulation of production of small RNA involved in gene silencing by RNA                                        |
| GO:0048705 | 0.026            | 1.551       | skeletal system morphogenesis                                                                                  |
| GO:0032870 | 0.029            | 1.410       | cellular response to hormone stimulus                                                                          |
| GO:0035033 | 0.031            | 7.154       | histone deacetylase regulator activity                                                                         |
| GO:0030521 | 0.032            | 2.933       | androgen receptor signaling pathway                                                                            |
| GO:0016772 | 0.034            | 1.328       | transferase activity, transferring phosphorus-containing groups                                                |
| GO:0060589 | 0.034            | 1.580       | nucleoside-triphosphatase regulator activity                                                                   |
| GO:0000975 | 0.034            | 1.229       | regulatory region DNA binding                                                                                  |
| GO:0001067 | 0.034            | 1.228       | regulatory region nucleic acid binding                                                                         |
| GO:0008047 | 0.034            | 1.490       | enzyme activator activity                                                                                      |
| GO:0030695 | 0.034            | 1.601       | GTPase regulator activity                                                                                      |
| GO:0044212 | 0.034            | 1.234       | transcription regulatory region DNA binding                                                                    |
| GO:0010646 | 0.034            | 1.150       | regulation of cell communication                                                                               |
| GO:0023051 | 0.035            | 1.148       | regulation of signaling                                                                                        |
| GO:0045624 | 0.035            | 3.976       | positive regulation of T-helper cell differentiation                                                           |
| GO:0060149 | 0.035            | 3.976       | negative regulation of posttranscriptional gene silencing                                                      |
| GO:0060967 | 0.035            | 3.976       | negative regulation of gene silencing by RNA                                                                   |
| GO:0010171 | 0.036            | 2.329       | body morphogenesis                                                                                             |
| GO:0050793 | 0.036            | 1.166       | regulation of developmental process                                                                            |
| GO:1903844 | 0.041            | 1.861       | regulation of cellular response to transforming growth factor beta stimulus                                    |
| GO:0007179 | 0.042            | 1.853       | transforming growth factor beta receptor signaling pathway                                                     |
| GO:0051148 | 0.045            | 2.121       | negative regulation of muscle cell differentiation                                                             |
| GO:0065005 | 0.045            | 3.001       | protein-lipid complex assembly                                                                                 |
| GO:0034399 | 0.045            | 1.949       | nuclear periphery                                                                                              |
| GO:0031063 | 0.046            | 2.864       | regulation of histone deacetylation                                                                            |
| GO:0051154 | 0.046            | 2.864       | negative regulation of striated muscle cell differentiation                                                    |
| GO:0060972 | 0.046            | 3.493       | left/right pattern formation                                                                                   |
| GO:0043372 | 0.046            | 3.728       | positive regulation of CD4-positive, alpha-beta T cell differentiation                                         |
| GO:0072608 | 0.049            | 5.681       | interleukin-10 secretion                                                                                       |
| GO:2001179 | 0.049            | 5.681       | regulation of interleukin-10 secretion                                                                         |

**Supplementary Table 4**  
**Oligonucleotides used in this study.**

**Primers for cloning CGIs - includes 15bp homology for HD cloning in pEGFP-N2-pB-min vector**

| Target   | Primer sequences (F/R)                                                        |
|----------|-------------------------------------------------------------------------------|
| VWA1     | TTGACGCATGGCTAGGCTACCGTGCAGTTCG / AATTGACGCATGTTAAATATCACCCACGGACCC           |
| TNFRSF1A | TTGACGCATGGCTAGCCGACGAATTCCTCCAGC / AATTGACGCATGTTACGCCACCTTCTCTTTAGGG        |
| CDH7     | TTGACGCATGGCTAGTTCGCGTCTTTCCAGTAGCCC / AATTGACGCATGTTACGTGTGCATCCGAAAGAACGTG  |
| CDH13    | TTGACGCATGGCTAGGCTCTACCCATGCTTTCGTGA / AATTGACGCATGTTAAGCTCTCTCTCCCGTTAAC     |
| CDKN2A   | TTGACGCATGGCTAGGCTCCGACCGTAATTCCTCG / AATTGACGCATGTTAGAGCCAGTCTCTCTCTTG       |
| BUB1     | TTGACGCATGGCTAGCTAACGAATTATCCAGATTGCTCA / AATTGACGCATGTTAGGCCAGGTTTCGGTTCAAC  |
| ZFP42    | TTGACGCATGGCTAGTATTACACCCACGCTATTGT / AATTGACGCATGTTACATGAACAAGACTCACCCCTGTT  |
| EPHB1    | TTGACGCATGGCTAGTAGTAGCAATGTGACACCAGGA / AATTGACGCATGTTAGCAAGCAGCAGAGGAACC     |
| DAZL     | TTGACGCATGGCTAGGCCGAGTTTACCCACGAGTGAA / AATTGACGCATGTTAGACTGAGGCACCGGACCTGC   |
| SFRP1    | TTGACGCATGGCTAGCGTCTGCCCAAACCTCCAG / AATTGACGCATGTTATCTCCCTTGTCTCTTCTCTCT     |
| MLH1     | TTGACGCATGGCTAGGACGAAGAGACCCAGCAACCCAC / AATTGACGCATGTTAAGAAACACAGGTTGCGGAAAA |
| GATA4    | TTGACGCATGGCTAGCGGGGAGGAGAAAGGGAAC / AATTGACGCATGTTAGTTGGCAATTTCCGGTGAAGTGA   |

**bsPCR primers for native CGI loci**

| Target   | Primer sequences (F/R)                                     |
|----------|------------------------------------------------------------|
| CDH7 L   | AAGGAATTTATTTGTATAGATTYGTAGG / AACCTCTCTCAATCACAA          |
| CDH7 R1  | AGTGGTTGTGATTGGAGG / CACTCACCTAAAACCTCRCTA                 |
| CDH7 R2  | GTTGTGATTGGAGGAGGAGTT / CAACAAAAACRCACATCTACC              |
| CDH13 L  | TTTTGTAAGTTATTGGTTTTGGTTATTA / CAACCCCTCTCCCTACCT          |
| CDH13 R1 | AGGTAGGGAAGAGGGGTTG / CCTCTAACTAAATCTTCTCAATACA            |
| CDH13 R2 | TTTTTTGTTTGGTAGGGAAGAGG / AAAAACCAAAATACCCCACTTAATATAAA    |
| BUB1 L   | ATATAAGTTTAGGATTTTGTAGGTTG / ACCTACCTCTTTACCCCT            |
| BUB1 R   | AGGGGGTAAAAGAGGTAGGT / CCTAAATACTAAAACAAAAACCAATTC         |
| GATA4 L  | GGATGAGGATTATAGGAAGGGG / AACCTACCTACTAAACCTAAAATTC         |
| GATA4 R  | GAATTTTTAGGTTTAGTAGGTAGGTT / AAAAACAAAAAATTAACAAATTCR      |
| ZFP42 L  | GGTTTAAAGGTAATGTGATTATATTA / ATCTAATCAAACTACAACCACCA       |
| ZFP42 R  | AGTTGATGGTGGTGTAGTT / ACATCTCAAAATAATAACAACAA              |
| DAZL L   | TGTGGTTATGGTTGTGGTG / CTTCATCTTAACTCTTTAACTACT             |
| DAZL R   | AGTGGTTAAAGGAGTTAAAGATGAAG / RCCTTCTAAAACCTAAAACCC         |
| SFRP1 L  | TTTTGTGTAATTTTAGGATTTT / CACTCCAACCTCAACCTC                |
| SFRP1 R  | GAGGTTGAGGTTGGAGTG / TCTAATCTAATAAACCAAC                   |
| EPHB1 R  | GTTGTTGTTTGGTTTGGTTT / ACTCCAAACCTCTTACCC                  |
| MLH1 L   | GCCTGTCGACTTCCATCTTGCT / CGAATAACCCCTGCCACGAACGA           |
| CDKN2A L | GTTTTGTGTAGATTTTTATTTATTTGGAT / ATCCCTCAAAAAATTAACAAAAAAT  |
| CDKN2A R | ATTTTTTTTTAAATTTTTGGAGGGAT / CCAACTCTCTCTTACCAA            |
| VWA1     | TGTTTTGATTTTTGTATTATTATAGA / CACCAACTCAACACATAATAACC       |
| TNFRSF1A | GTTTTGTGTGAGGATATTTAAA / CAAAAACAAACAAAACTAACCAAC          |
| BRC2     | GGGAATAGGTTTGTAGAGAAATTT / CCAACCAACCTACTTAAAAAAC          |
| MIDN1 1  | ATTTGGTTTTAGAAATTTTTTTG / AACCCCTAAACAACTCACTACTC          |
| MIDN1 2  | GGTAYGTTATTTTTAATTGTTAAGATAGTAG / CTAACCTAACCTACAACAAAAAAC |

**bsPCR primers for integrated CGI loci**

| Target   | Forward primer sequence                                      |
|----------|--------------------------------------------------------------|
| CDH7 L   | GATAGTTTGCCTAAAATTGACGTATG / TCCTCCAATCACACCCACT             |
| CDH7 R1  | GTTGTGATTGGAGGAGGAGTT / TAAAAATAATCATACGTAAAATTAACGCATA      |
| CDH7 R2  | GTTGTGATTGGAGGAGGAGTT / TTAACCTAAAAAATAATCATATTATAACRTA      |
| CDH13 L  | TTAATTTTAGAAGATAGTTTGTGTAATTTG / CAACCCCTCTCTCCCTACCT        |
| CDH13 R1 | AGGTAGGGAAGAGGGGTTG / TAAAAATAATCATACGTAAAATTAACGCATA        |
| CDH13 R2 | AGGTAGGGAAGAGGGGTTG / TTAACCTAAAAAATAATCATATTATAACRTA        |
| ZFP1 L   | GATAGTTTGCCTAAAATTGACGTATG / ATCTAATCAAACTACAACCACCA         |
| ZFP1 R   | TGGGTGGTTGTAGTTTGTAGAT / TAAAAATAATCATACGTAAAATTAACGCATA     |
| GATA4 L1 | GATAGTTTGCCTAAAATTGACGTATG / AACCTCACTACTAAACCTAAAATTC       |
| GATA4 L2 | TTAATTTTAGAAGATAGTTTGTGTAATTTG / CTCCCAACAAACAAAAATCC        |
| GATA4 R  | GAATTTTAGGTTTAGTAGGTAGGTT / TAAAAATAATCATACGTAAAATTAACGCATA  |
| EPHB1 L  | GATAGTTTGCCTAAAATTGACGTATG / ACACCAACCAACCACTACTC            |
| EPHB1 R1 | GGTTTGGATTATTTATTGTTTTTTTGG / GATAGTTTGCCTAAAATTGACGTATG     |
| EPHB1 R2 | GTTGTTGTTTGGTTTGGTTT / TAAAAATAATCATACGTAAAATTAACGCATA       |
| SFRP1 R1 | GAGGTTGAGGTTGGAGTG / TAAAAATAATCATACGTAAAATTAACGCATA         |
| SFRP1 R2 | GTATTGATTGGAGGTTGTAGG / TAAAAATAATCATACGTAAAATTAACGCATA      |
| DAZL L   | GATAGTTTGCCTAAAATTGACGTATG / CCTCACAAACCCCAAAAAATA           |
| DAZL R   | TTATTTTGGGGTTGTTGTAGG / TAAAAATAATCATACGTAAAATTAACGCATA      |
| MLH1 L   | GATAGTTTGCCTAAAATTGACGTATG / ATCATCTCTTAAATAACATTAACCTAAC    |
| MLH1 R   | GGTTAGTTAATGTTATTAAGAGATGA / TAAAAATAATCATACGTAAAATTAACGCATA |
| CDKN2A L | GATAGTTTGCCTAAAATTGACGTATG / ATCCCTCAAAAAATTAACAAAAAAT       |
| CDKN2A R | TAGTTAGTYAAGGTTTATGTTT / TAAAAATAATCATACGTAAAATTAACGCATA     |
| BUB1 L   | GATAGTTTGCCTAAAATTGACGTATG / CCAACCACTACTCTTTTAC             |

**Primers for Sanger sequencing of pGEM T-Easy bisulfite clones**

| Target | Primer sequence      |
|--------|----------------------|
| T7     | TAATACGACTCACTATAGGG |
| SP6    | TATTTAGGTGACACTATAG  |

**ChIP primers for CGI loci**

| Target   | Forward primer sequence                         |
|----------|-------------------------------------------------|
| VWA1     | AACTGACCGCTGTTCCCTGA / GCACAGCTCCAGCACATAG      |
| TNFRSF1A | TGAAAAGGCTCAGGGACGA / CGAGGATGAGGGACGCTATG      |
| BRC2     | AGTGGTGGTGTAGTGGGTTGG / TTGGCAGAGACAAAAGGGCAAG  |
| MIDN1    | GCCACATGTCCACGCCATTGC / GTTGGGTGTAGCGTGCCTGC    |
| MAP1S    | TGGTGTACCTGTGAATTTGAGC / CACGGGATCCGAGTCAGACAGG |

**Oligonucleotides for plasmid construction**

| Oligo name         | Sequence                                                                                                                                                        |
|--------------------|-----------------------------------------------------------------------------------------------------------------------------------------------------------------|
| Min-req-T oligo    | ATGCATTAGTTATTATTAACCTAGAAAGATAGTCTGCTAAAATTGACGCATGGCTAGCACCGGCTACTAGTTAATTAACATCGCTCAATTTACGCATGATTATCTTTAACGTACGTCACAATATGATTATCTTTCTAGGGTTAATAATAGTAATCAATT |
| Min-req-B oligo    | AATTGATTAATTAACCTAGAAAGATAATCATATTGTGACGTACGTTAAAGATAATCATGCTAAAATTGACGCATGTTAATTAACATAGTACCGGTGCTAGCCATGCGTCAATTTTACGCAGACTATCTTTCTAGGGTTAATAATAACTAATGCAT     |
| DNMT3B-KI-gRNA24_T | CACCGAAAGCATGAAGGGAGACACC                                                                                                                                       |
| DNMT3B-KI-gRNA24_B | AAACGGTGTCTCCCTTCATGCTTTC                                                                                                                                       |
| U-3B-3XT7-5'       | TCAGAATCCACCCTAAGAAATGCATCCTGGGCTTGGCTGAGAACACAGAGCCATGGCGGGGAAACATGTCCCTCTCATGTCCCTGCTCCCTTTACCCACCCACTTCTGGCTCTCCACAGGAAAGCATGGCTCCATGACCGGGCGGCAGC           |
| U-3XT7             | ATGGCTTCCATGACCGGGCGGACAAATGGGCGGCTCCAGCCAGCATGGCTCTATGACAGGGGACACAGATGGGGGAAGCTCTGCTAGAAATGGTGTAGCATGACAGGAGCCAGCAATGGGATCTAGA                                 |
| U-3B-3XT7-3'       | ATCGAATTCGGATAGCTCCAGGATTGGGGGCGAGTCGGAGGACTGGTCTGCTGAGGCCCGGTTGACGAGGATCGAGTCTCCCTCCCGCCGGCTCTCTTCCATTGAGATGTCTGCTCTCCCTCAITTAGATCCCAATTTGCTGGCTCTCT           |
| gDNA-3XT7-3B_T     | CCTGTCCACATGGAACCAAGTCC                                                                                                                                         |
| gDNA-3XT7-3B_B     | CTGTTGCTCCCTGTCATAGAGG                                                                                                                                          |

**Supplementary Table 5**

Summary of sequencing statistics for RRBS. Aligned reads counts are following PCR duplicate removal.

| Sample                                             | Total reads (x10 <sup>6</sup> ) | Aligned reads (x10 <sup>6</sup> ) | Mean CG coverage | Bisulfite conversion rate |
|----------------------------------------------------|---------------------------------|-----------------------------------|------------------|---------------------------|
| <i>DNMT3B expression in DKO cells experiment 1</i> |                                 |                                   |                  |                           |
| HCT116                                             | 57.98                           | 31.22                             | 26.83            | 99.67%                    |
| DKO                                                | 56.16                           | 30.61                             | 26.53            | 99.69%                    |
| DKO + DNMT3B                                       | 56.12                           | 32.21                             | 29.10            | 99.66%                    |
| DKO + DNMT3Bcd                                     | 52.63                           | 28.31                             | 25.19            | 99.62%                    |
| <i>DNMT3B expression in DKO cells experiment 2</i> |                                 |                                   |                  |                           |
| HCT116                                             | 38.46                           | 22.68                             | 20.30            | 99.67%                    |
| DKO                                                | 42.46                           | 25.46                             | 23.03            | 99.68%                    |
| DKO + DNMT3B                                       | 46.99                           | 28.40                             | 25.83            | 99.68%                    |
| DKO + DNMT3Bcd                                     | 46.42                           | 27.87                             | 25.42            | 99.68%                    |
| DKO + GFP                                          | 80.56                           | 48.64                             | 42.78            | 99.68%                    |
| <i>5-aza-dC treatment of HCT116</i>                |                                 |                                   |                  |                           |
| HCT116 day 0                                       | As HCT116 in DKO experiment 1   |                                   |                  |                           |
| HCT116 day 3                                       | 60.98                           | 30.80                             | 25.59            | 99.65%                    |
| HCT116 day 6                                       | 50.83                           | 26.75                             | 23.17            | 99.68%                    |
| HCT116 day 13                                      | 49.68                           | 28.41                             | 25.50            | 99.65%                    |
| HCT116 day 16                                      | 61.50                           | 32.86                             | 27.84            | 99.66%                    |
| HCT116 day 22                                      | 52.88                           | 28.29                             | 24.21            | 99.67%                    |
| HCT116 day 28                                      | 60.14                           | 33.91                             | 30.37            | 99.67%                    |
| HCT116 day 40                                      | 53.64                           | 28.12                             | 23.94            | 99.67%                    |
| HCT116 day 40 control                              | 47.91                           | 25.66                             | 21.76            | 99.67%                    |
| <i>5-aza-dC treatment of DNMT3B KO</i>             |                                 |                                   |                  |                           |
| DNMT3B KO day 0                                    | 48.41                           | 27.88                             | 25.04            | 99.66%                    |
| DNMT3B KO day 3                                    | 47.92                           | 26.99                             | 23.64            | 99.67%                    |
| DNMT3B KO day 6                                    | 45.87                           | 23.22                             | 20.43            | 99.68%                    |
| DNMT3B KO day 13                                   | 59.87                           | 31.94                             | 26.78            | 99.67%                    |
| DNMT3B KO day 16                                   | 49.27                           | 27.42                             | 23.96            | 99.69%                    |
| DNMT3B KO day 22                                   | 53.32                           | 29.40                             | 25.45            | 99.69%                    |
| DNMT3B KO day 28                                   | 51.53                           | 28.62                             | 24.49            | 99.67%                    |
| DNMT3B KO day 40                                   | 47.75                           | 26.36                             | 23.25            | 99.70%                    |
| DNMT3B KO day 40 control                           | 54.05                           | 30.80                             | 27.42            | 99.69%                    |
| <i>5-aza-dC treatment of DNMT1 KO</i>              |                                 |                                   |                  |                           |
| DNMT1 KO day 0                                     | 61.57                           | 33.50                             | 28.23            | 99.66%                    |
| DNMT1 KO day 3                                     | 51.79                           | 26.85                             | 23.45            | 99.68%                    |
| DNMT1 KO day 6                                     | 48.56                           | 25.17                             | 22.35            | 99.67%                    |
| DNMT1 KO day 13                                    | 56.15                           | 29.72                             | 25.92            | 99.68%                    |

|                            |       |       |       |        |
|----------------------------|-------|-------|-------|--------|
| DNMT1 KO day 16            | 49.88 | 27.04 | 23.28 | 99.66% |
| DNMT1 KO day 22            | 59.70 | 32.34 | 27.56 | 99.67% |
| DNMT1 KO day 40            | 52.22 | 27.10 | 23.67 | 99.68% |
| DNMT1 KO day 40<br>control | 55.88 | 31.63 | 28.30 | 99.67% |

### Supplementary Table 6

Summary of sequencing statistics for ChIP-Rx-seq. Aligned reads are after duplicate and multi-mapper removal and reported for both genomes (hg38/dm6). For T7-DNMT3B ChIP-Rx-seq, which was paired end sequencing, fragments are quoted.

| Sample                 | total reads or read<br>pairs<br>(x10 <sup>6</sup> ) | Aligned reads or<br>fragments hg38/dm6<br>(x10 <sup>6</sup> ) |
|------------------------|-----------------------------------------------------|---------------------------------------------------------------|
| <i>H3K36me3</i>        |                                                     |                                                               |
| HCT116 Input rep. 1    | 70.54                                               | 59.19/0.11                                                    |
| HCT116 H3K36me3 rep. 1 | 70.07                                               | 58.09/0.29                                                    |
| DKO Input rep.1        | 72.20                                               | 60.76/0.12                                                    |
| DKO H3K36me3 rep. 1    | 62.24                                               | 55.08/0.22                                                    |
| HCT116 Input rep. 2    | 72.15                                               | 60.51/0.13                                                    |
| HCT116 H3K36me3 rep. 2 | 70.96                                               | 58.78/0.28                                                    |
| DKO Input rep.2        | 74.59                                               | 62.69/0.14                                                    |
| DKO H3K36me3 rep. 2    | 72.79                                               | 60.51/0.24                                                    |
| <i>T7-DNMT3B</i>       |                                                     |                                                               |
| HCT116 Input rep. 1    | 74.80                                               | 63.42/0.005                                                   |
| HCT116 T7-IP rep. 1    | 52.35                                               | 39.36/1.902                                                   |
| T7-DNMT3B Input rep. 1 | 78.31                                               | 66.45/0.005                                                   |
| T7-DNMT3B T7-IP rep. 1 | 73.32                                               | 62.90/0.332                                                   |
| HCT116 Input rep. 2    | 74.94                                               | 63.58/0.006                                                   |
| HCT116 T7-IP rep. 2    | 66.10                                               | 56.25/0.085                                                   |
| T7-DNMT3B Input rep. 2 | 68.89                                               | 57.81/0.006                                                   |
| T7-DNMT3B T7-IP rep. 2 | 83.90                                               | 70.50/0.179                                                   |

# Supplementary Figure 1

**a**

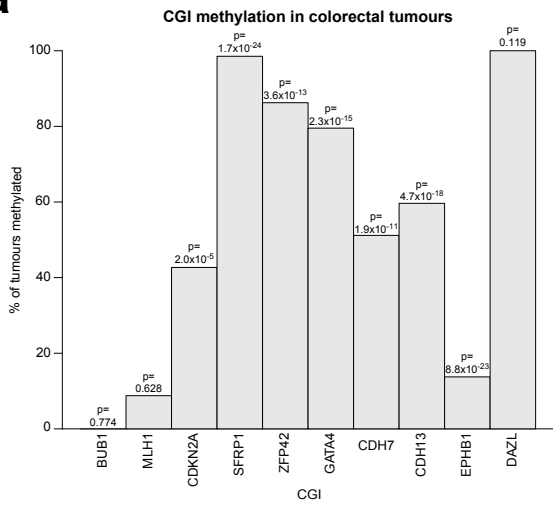

**b**

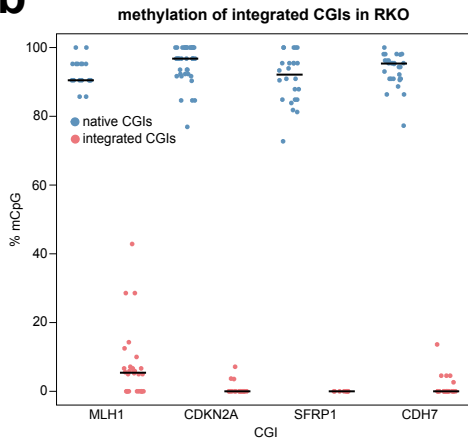

**c**

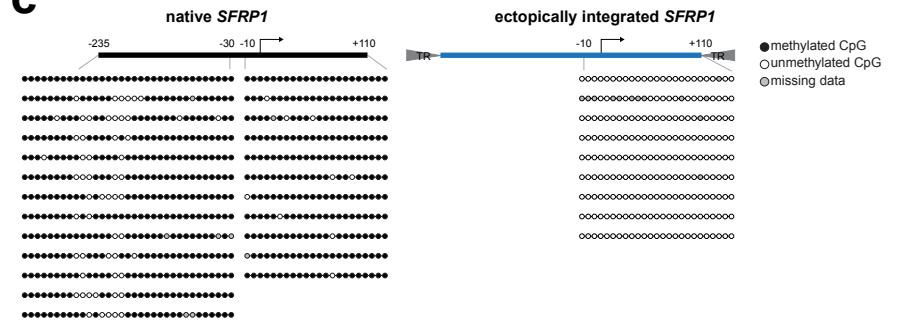

## Supplementary Figure 1

### CGIs are not de novo methylated at ectopic locations in colorectal cancer

a) Frequency of methylation at CGIs integrated using piggyBac in 342 colorectal tumours. P-values were derived from comparing mean methylation at these CGIs in the colorectal tumours to that observed in 42 normal samples (two-sided Wilcoxon rank sum tests). b) Ectopically integrated aberrantly methylated CGIs do not become de novo methylated in RKO cells. Plot showing the mean methylation per clone as assayed by bsPCR for 4 CGIs in their native location and when ectopically integrated in a piggyBac transposon. Each point represents the mean methylation level for a single bsPCR clone. The thick line indicates the median for each CGI. The number of clones analysed per CGI is indicated in Supplementary Table 2. c) *SFRP1* is not hypermethylated when integrated into ectopic locations in RKO cells. Illustrative example bsPCR data from panel *b* showing the *SFRP1* promoter CGI in its native and integrated state. Circles are CpGs with different clones arranged vertically. Each integrated clone derives from a separate genomic integration. Black circles are methylated CpGs and white circles are unmethylated CpGs. Grey circles represent missing data due to sequencing errors. Source data are provided as a Source Data file.

# Supplementary Figure 2

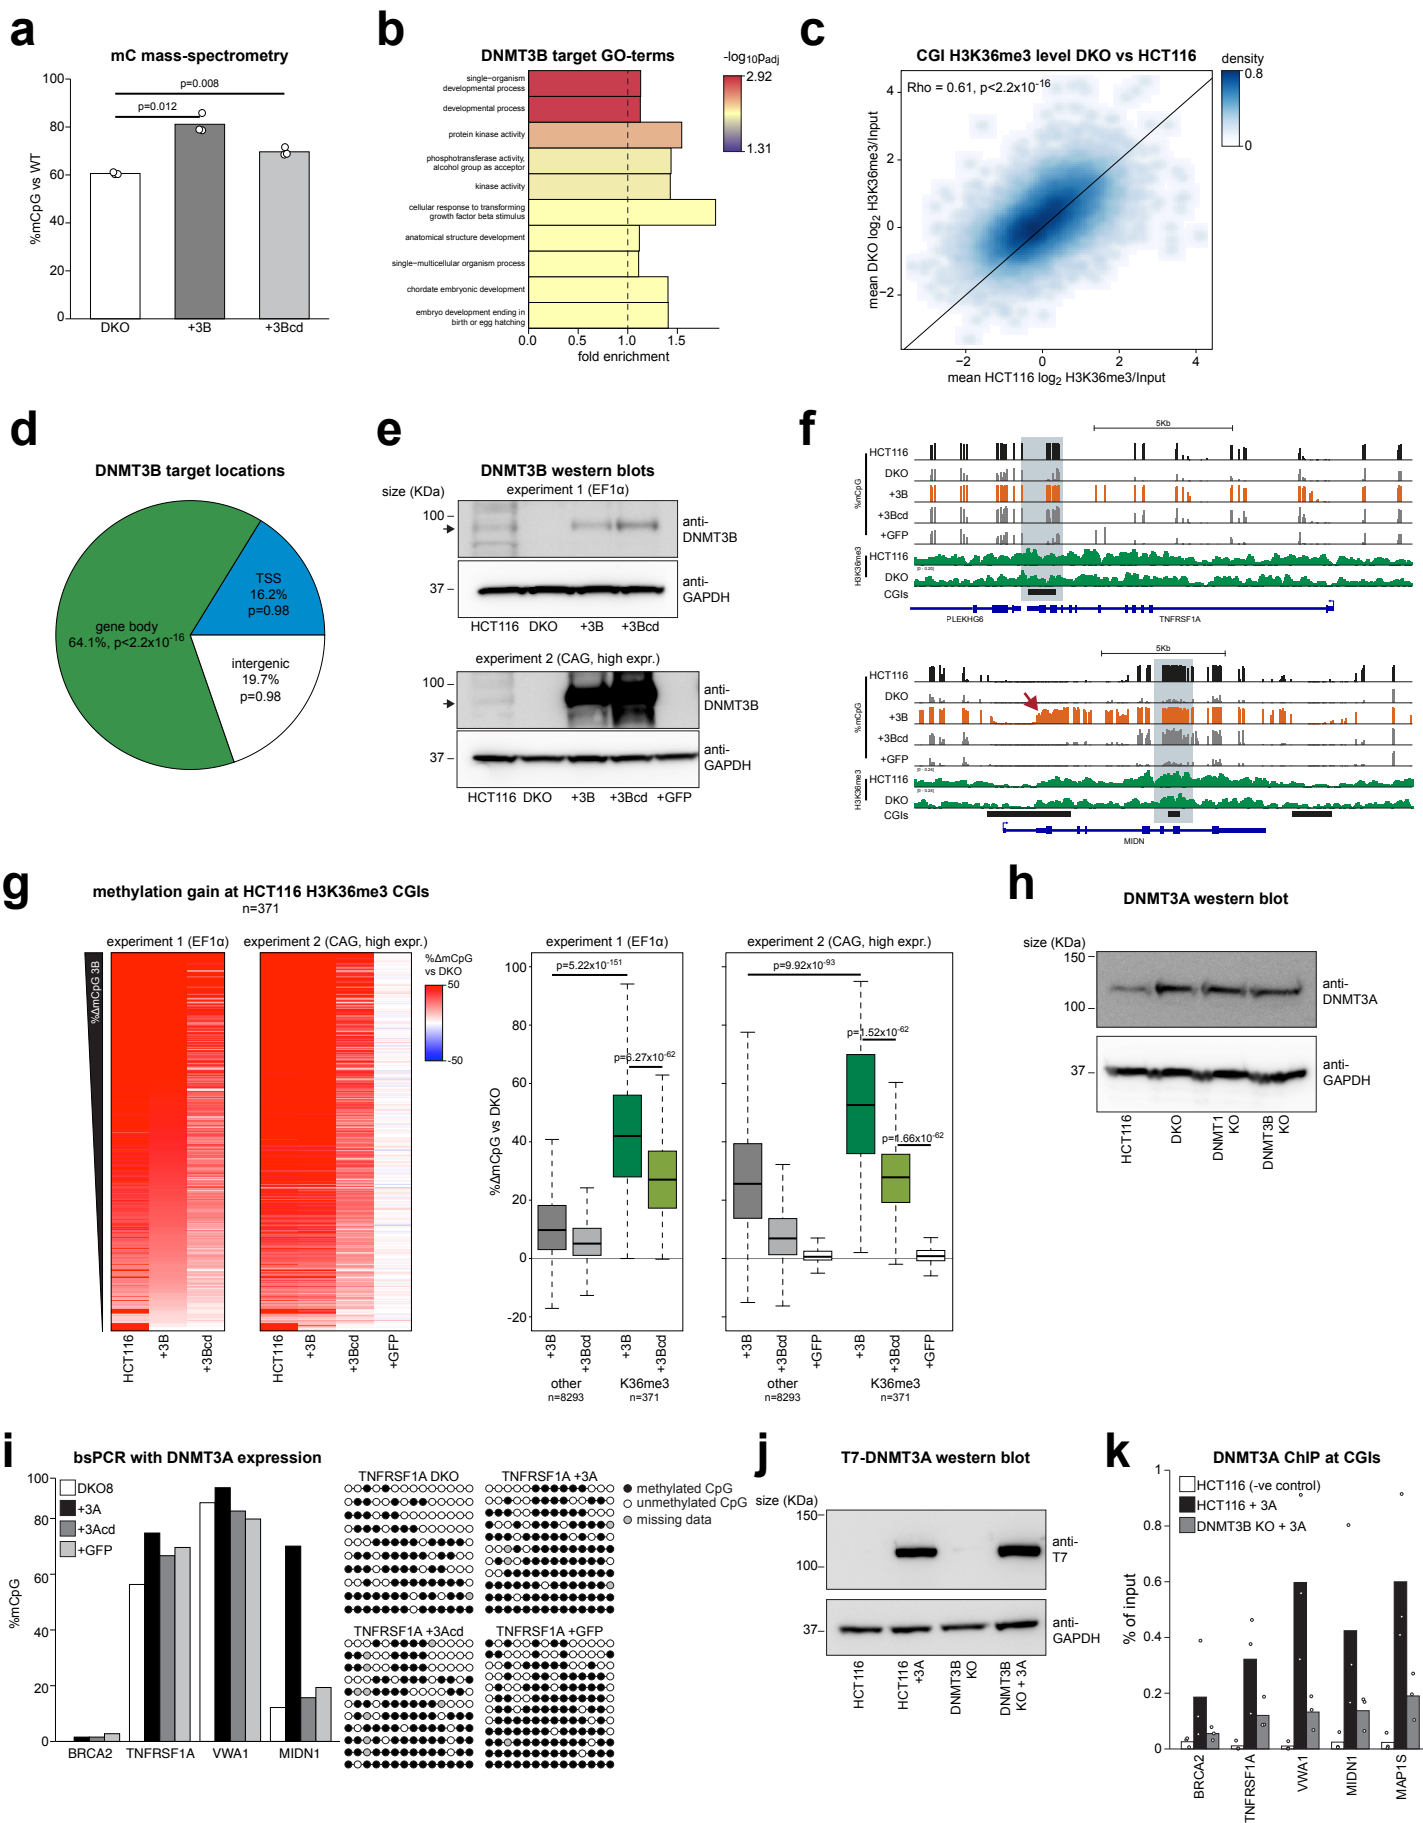



## Supplementary Figure 2

### DNMT3B methylates H3K36me3 marked CGIs in colorectal cancer cells

a) Expression of DNMT3B in DKO cells results in a global gain of DNA methylation. Barplot of total methylated cytosine levels estimated by mass-spectrometry. Shown are mean methylation levels relative to HCT116 cells from 3 technical replicates. P-values are from two-sided t-tests. +3B = DKO + DNMT3B; +3Bcd = DKO + catalytically dead DNMT3B. b) Gene ontology analysis of genes associated with DNMT3B target CGIs. Top ten significant hits shown. Colour indicates Benjamini-Hochberg adjusted FDR significance level, DNMT3B target CGIs (n = 2,238) versus all CGIs (n = 22,179), two-sided Fisher's exact tests. Full list of significant GO-terms is included in Supplementary table 3. c) H3K36me3 levels at CGIs in DKO cells are correlated to those in HCT116 cells. Density scatter plot of mean normalised H3K36me3 levels at CGIs in DKO cells versus those in HCT116 cells (2 biological replicates each, n = 23,715 CGIs). Spearman's Rho correlation is indicated. P-value from Spearman's correlation test. d) DNMT3B target CGI are enriched in gene bodies. Pie chart showing the percentage of DNMT3B target CGIs in each category. P-values from one sided Fisher's exact tests for enrichment, DNMT target CGIs (n = 2,238) versus all CGIs (n = 22,179). e) Western blots comparing DNMT3B expression levels in two experiments. The upper panels show data from the first experiment (data in Figure 2) where the EF-1 $\alpha$  promoter drives DNMT3B expression. The lower panels show data from the second experiment where the CAG promoter drives higher levels of DNMT3B. Arrows indicate DNMT3B. +3B = DKO + DNMT3B; +3Bcd = DKO + catalytically dead DNMT3B; +GFP = DKO + GFP. f) Examples of DNMT3B target CGIs from the second experiment. Genome browser plots showing DNA methylation levels with HCT116 and DKO H3K36me3 ChIP signal. CGIs and genes are shown below the plots. CGIs gaining methylation when DNMT3B is expressed in DKO cells are indicated in light blue. +3B = DKO + DNMT3B; +3Bcd = DKO + catalytically dead DNMT3B; +GFP = DKO + GFP. Scale for methylation data is 0 to 100%. For H3K36me3 it is 0 to 0.24 normalised reads per 10<sup>6</sup>. g) H3K36me3 marked CGIs gain methylation when DNMT3B is expressed in DKO cells. Left, heatmaps of relative methylation levels at methylated HCT116 H3K36me3 marked CGIs. Values denote the change in methylation relative to DKO cells. CGIs are ranked by their mean gain of methylation in experiment 1. Left, boxplots of relative methylation at H3K36me3 marked CGIs and all other CGIs methylated in HCT116 cells. P-values are from two-sided Wilcoxon rank sum tests. Lines=median; box=25th–75th percentile; whiskers=1.5 $\times$  interquartile range from box. h) DNMT3A is upregulated in DNMT knockout cells. Western blot for DNMT3A in HCT116 cells, DKO cells and HCT116 cells lacking either DNMT1 (DNMT1 KO) or DNMT3B (DNMT3B KO). This experiment was repeated twice with similar results. i) Overexpression of DNMT3A in DKO cells results in gains of DNA methylation at DNMT3B targets. Left, barplot showing mean methylation levels estimated by bisulfite PCR at CGIs in DKO8 and transfected DKO cells. Right, representative example bsPCR data from the TNFRSF1A gene CGI. +3A = DKO + DNMT3A; +3Acd = DKO + catalytically dead DNMT3A; +GFP = DKO + GFP. Circles are CpGs with different clones arranged vertically. Black circles are methylated CpGs and white circles are unmethylated CpGs. Grey circles represent missing data due to sequencing errors. j) Ectopic T7-DNMT3A is expressed to a similar level in HCT116 and DNMT3B KO cells. Western blot for T7-tagged DNMT3A in HCT116 cells and

HCT116 cells lacking DNMT3B (DNMT3B KO). This experiment was conducted once.

k) DNMT3A is recruited to the genome more efficiently in the presence of DNMT3B. qPCR analysis of CGIs following CHIP for T7-tagged DNMT3A in HCT116 and DNMT3B KO cells expressing T7-DNMT3A. The bars indicate the mean of 3 biological replicates with the individual replicates shown as points. Source data are provided as a Source Data File. Uncropped western blots for panels e, h and j are supplied in Supplementary Figure 7.

# Supplementary Figure 3

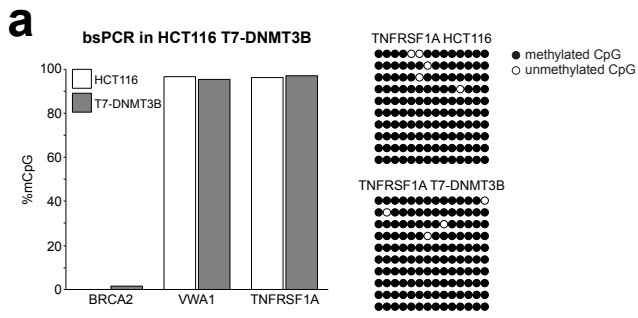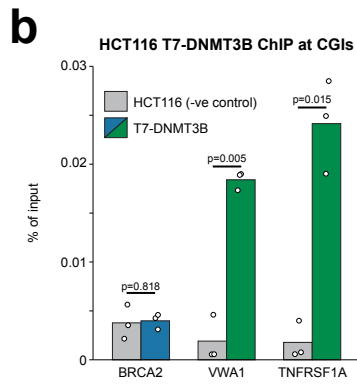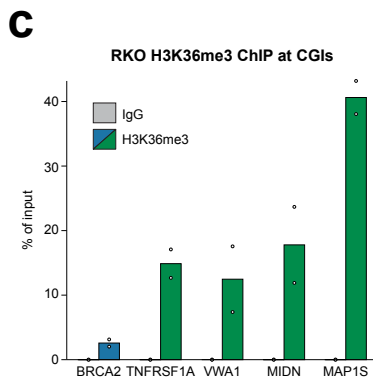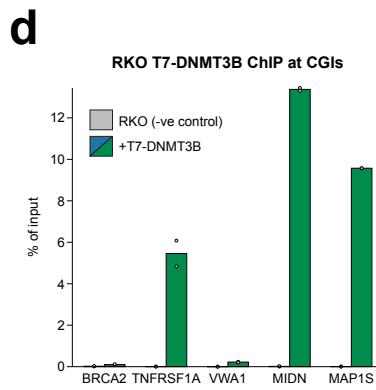

### Supplementary Figure 3

#### **DNMT3B is recruited to H3K36me3 marked CGIs**

a) T7 tagging of endogenous DNMT3B does not result in losses of DNA methylation at CGIs. Left, barplot showing mean methylation levels estimated by bisulfite PCR at CGIs in HCT116 and T7-DNMT3B cells. Right, representative example bsPCR data from the *TNFRSF1A* gene CGI. Circles are CpGs with different clones arranged vertically. Black circles are methylated CpGs and white circles are unmethylated CpGs. b) DNMT3B localises to CGIs that gain methylation upon DNMT3B expression in DKO cells. qPCR analysis of CGIs following anti-T7 ChIP from T7-DNMT3B cells and HCT116 cells lacking the tag (-ve control). The bars indicate the mean of 3 biological replicates with the individual replicates shown as points. P-values are from two-sided T-tests. c) HCT116 DNMT3B targets are marked by H3K36me3 in RKO cells. qPCR analysis of H3K36me3 ChIP from RKO cells. The bars indicate the mean of 2 biological replicates with the individual replicates shown as points. d) DNMT3B localises to H3K36me3 marked CGIs in RKO cells. qPCR analysis of T7-tagged DNMT3B from ectopically expressing RKO cells and non-expressing cells as a negative control. The bars indicate the mean of 2 biological replicates with the individual replicates shown as points. Source data are provided as a Source Data file.

# Supplementary Figure 4

**a**

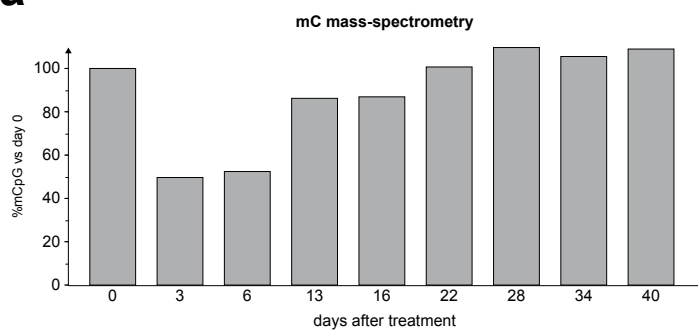

**b**

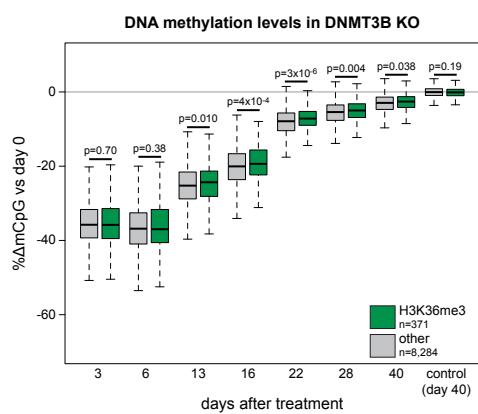

**c**

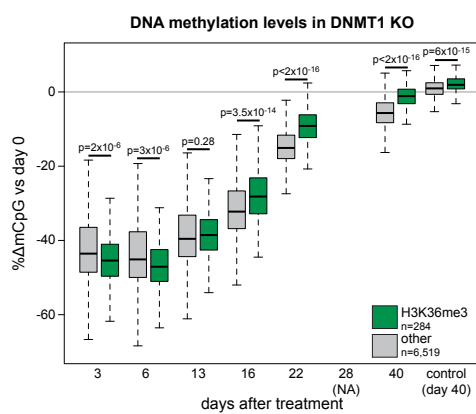

#### **Supplementary Figure 4**

#### **H3K36me3 marked CGIs preferentially recover methylation following pharmacological hypomethylation**

a) HCT116 DNA methylation levels recover 22 days after 5-aza-dC treatment. Barplot of total methylated cytosine levels estimated by mass-spectrometry. b) Recovery of DNA methylation in DNMT3B KO cells. Boxplots of relative methylation at H3K36me3 marked CGIs and all other CGIs methylated in HCT116 cells. P-values are from two-sided Wilcoxon rank sum tests. Lines=median; box=25th–75th percentile; whiskers=1.5× interquartile range from box. c) Recovery of DNA methylation in DNMT1 KO cells. Boxplots of relative methylation at H3K36me3 marked CGIs and all other CGIs methylated in HCT116 cells. P-values are from two-sided Wilcoxon rank sum tests. Lines=median; box=25th–75th percentile; whiskers=1.5× interquartile range from box. The sample at day 28 failed quality control during processing. Source data are provided as a Source Data file.

# Supplementary Figure 5

**a**

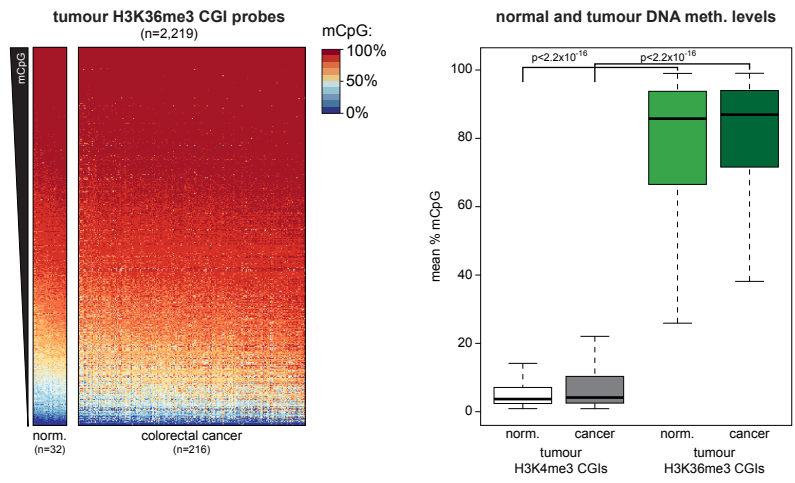

**b**

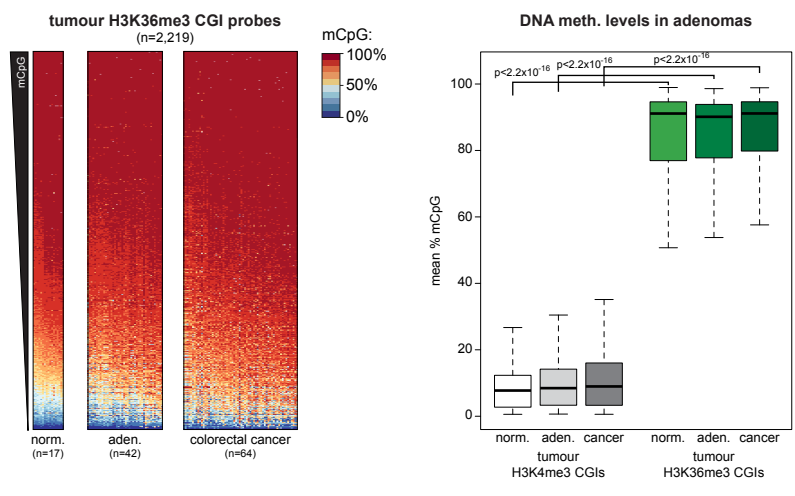

### Supplementary Figure 5

#### **H3K36me3 marked CGIs are methylated in colorectal tumours and the normal colon**

a) H3K36me3 marked CGIs are methylated in colorectal tumours. Left, Heatmaps of methylation levels at probes located within H3K36me3 peaks and CGIs in a second dataset of colorectal tumours and adjacent normal colon samples. Both CpGs and samples are ordered by mean DNA methylation levels in colorectal tumours. Right, boxplot of the mean CpG methylation for probes located within CGIs and H3K36me3 or H3K4me3 peaks for the same set of samples. P-values are from two-sided Wilcoxon rank sum tests. Lines=median; box=25th–75th percentile; whiskers=1.5× interquartile range from box. norm. = normal colon. b) H3K36me3 marked CGIs are methylated in adenomas. Left, Heatmaps of methylation levels at probes located within H3K36me3 peaks and CGIs in a second dataset of normal colon, adenomas and colorectal tumours. Both CpGs and samples are ordered by mean DNA methylation levels in colorectal tumours. Right, boxplot of the mean CpG methylation for probes located within CGIs and H3K36me3 or H3K4me3 peaks for the same set of samples. P-values are from two-sided Wilcoxon rank sum tests. Lines=median; box=25th–75th percentile; whiskers=1.5× interquartile range from box. norm. = normal colon, aden. = adenoma.



# Supplementary Figure 6

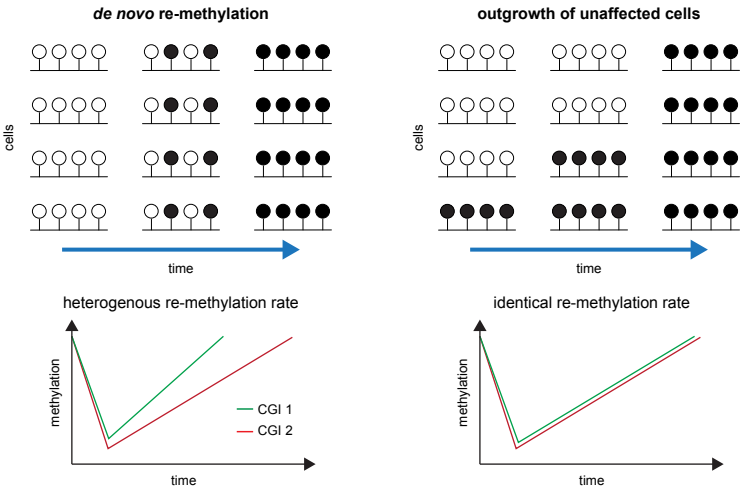

### **Supplementary Figure 6**

**Testing whether re-methylation following 5-aza-dC treatment can be explained by the outgrowth of cells escaping hypomethylation.** Schematic of the expected dynamics of re-methylation under two different scenarios, de novo methylation or the outgrowth of cells escaping hypomethylation due to a fitness advantage. If re-methylation was entirely explained by outgrowing cells, then the rate of re-methylation relative to the initial methylation level is expected to be identical for each CGI. The upper panel depicts a schematic of methylation levels at a single CGI in a population of cells over time under both models. The lower panel depicts the expected dynamics of re-methylation at different CGIs over time.

# Supplementary Figure 7

**a** supplementary figure 2e top panel  
experiment 1 (EF1 $\alpha$ )

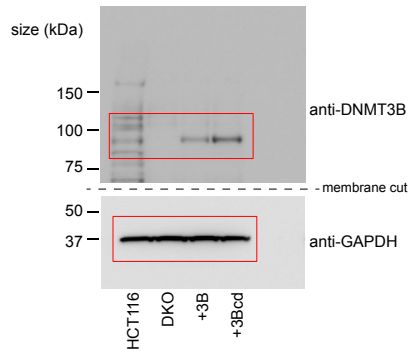

**b** supplementary figure 2e bottom panel  
experiment 2 (CAG, high expr.)

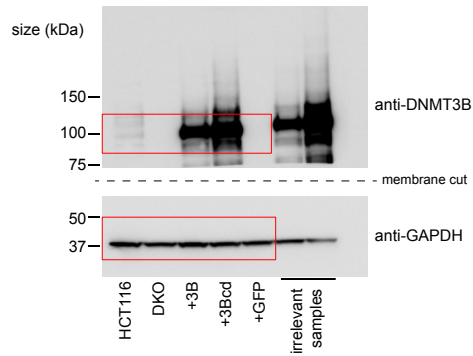

**c** supplementary figure 2h

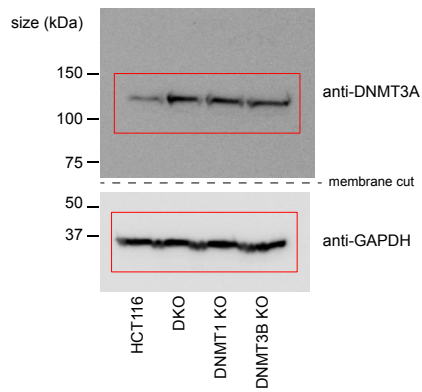

**d** supplementary figure 2j

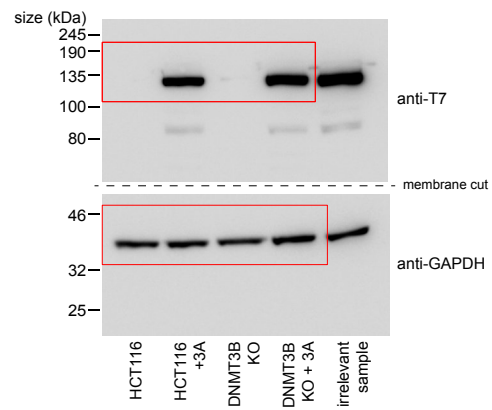

### **Supplementary Figure 7**

#### **Uncropped Western blot scans**

Uncropped scans of the Western blots associated with this study. The corresponding figure number is indicated for each blot. Membranes were cut to probe GAPDH loading controls on the same blot as experimental antibodies. Different exposure times were used for the loading control and experimental antibody. Red boxes indicate the part of the membrane shown in the figure. Irrelevant samples were loaded on some gels and not shown in the main figures.
